# Supplementary material
Source: PubMed Central journal article supplement (PMC2394502)
Supplement: NIHMS44406-supplement-1.pdf [file NIHMS44406-supplement-1.pdf]

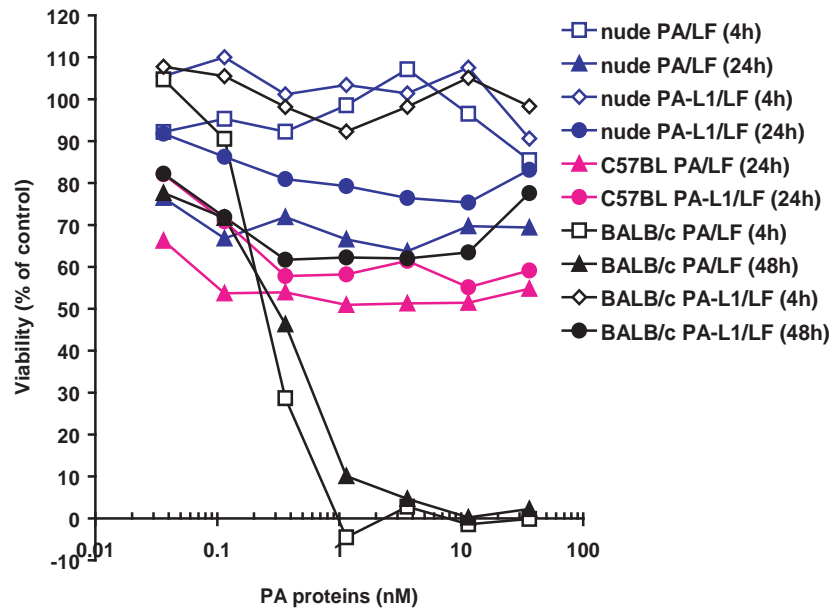

Fig. S1. Cytotoxicity of anthrax lethal toxins to the bone marrow derived macrophages isolated from the mice with different genetic background as indicated. The cells were treated with various concentrations of PA proteins combined with LF (5.5 nM) for the times as indicated. Cell viability was measured as described in Experimental Procedures.
